# Supplementary material for: Monitoring the Degradation of Collagen Hydrogels by Collagenase Clostridium histolyticum
Source: MDPI journal article supplement (doi:10.3390/gels6040046), 2020-11-27
Supplement: s1 [file s1]

# Monitoring the Degradation of Collagen Hydrogels by Collagenase *Clostridium histolyticum*

Hon Wei Ng, Yi Zhang, Rafea Naffa and Sujay Prabakar \*

Leather and Shoe Research Association of New Zealand, P.O. Box 8094, Palmerston North 4472, New Zealand

\* Correspondence: sujay.prabakar@lasra.co.nz; Tel.: +64-6-355-9028

Received: 21 October 2020; Accepted: 24 November 2020; Published: 30 November 2020

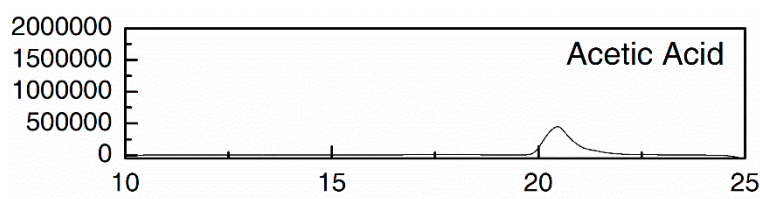

**Figure S1.** Chromatograms of size-exclusion chromatography (SEC) of acetic acid.

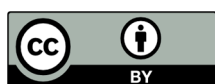

© 2020 by the authors. Licensee MDPI, Basel, Switzerland. This article is an open access article distributed under the terms and conditions of the Creative Commons Attribution (CC BY) license (<http://creativecommons.org/licenses/by/4.0/>).
